# Supplementary material
Source: PubMed Central journal article supplement (PMC8214245)
Supplement: NIHMS1694788-supplement-1.pdf [file NIHMS1694788-supplement-1.pdf]

**Supplementary Information for:**

Biphasic response of T cell activation to substrate stiffness

Dennis J Yuan, Lingting Shi, Lance C Kam

Corresponding author: Lance C Kam

Contact: [lk2141@columbia.edu](mailto:lk2141@columbia.edu)

**This file includes:**

Table S1

Figs. S1, S2

### Supplementary Figures

| Measured E (kPa) | Acrylamide (%w/v) | Bis-acrylamide (%w/v) | Strep-Acryl concentration (%w/v) |
|------------------|-------------------|-----------------------|----------------------------------|
| 5                | 4                 | 0.03                  | 0.0167                           |
| 17               | 8.666             | 0.0433                | 0.0167                           |
| 25               | 6.667             | 0.0667                | 0.0333                           |
| 75               | 6.667             | 0.2667                | 0.0333                           |
| 110              | 6.667             | 0.5333                | 0.0167                           |

**Table S1.** Composition of PA-gels and measured Young's modulus values.

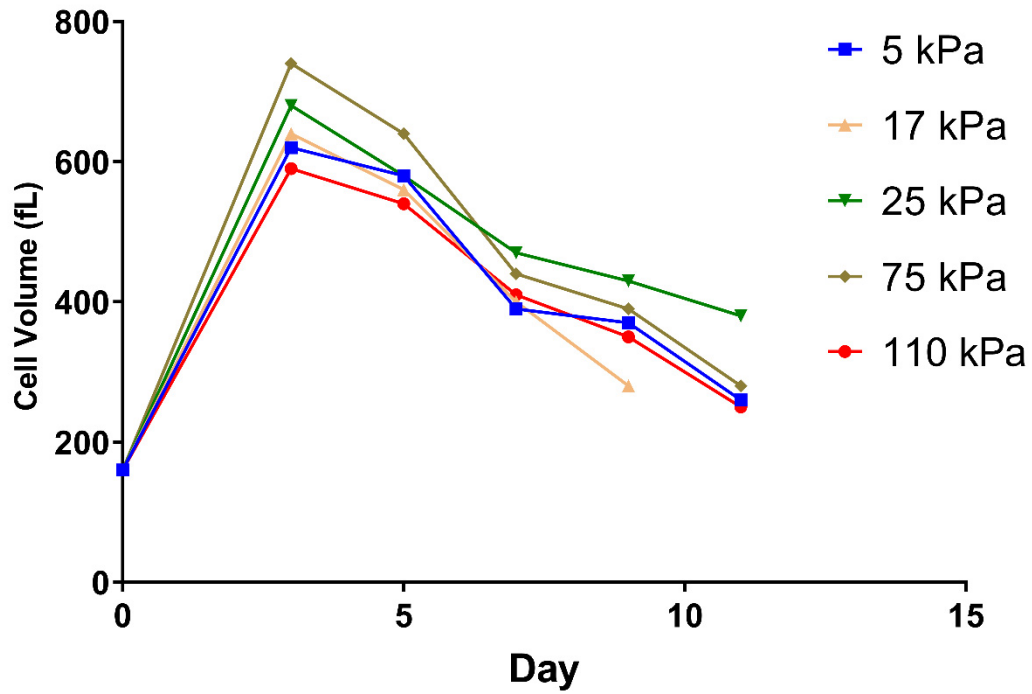

**Figure S1.** Cell sizing during long term proliferation of activated T cells on coated hydrogels. The data in this panel are from a representative experiment, comparing sizing of cells undergoing expansion from a single donor as a function of substrate stiffness.

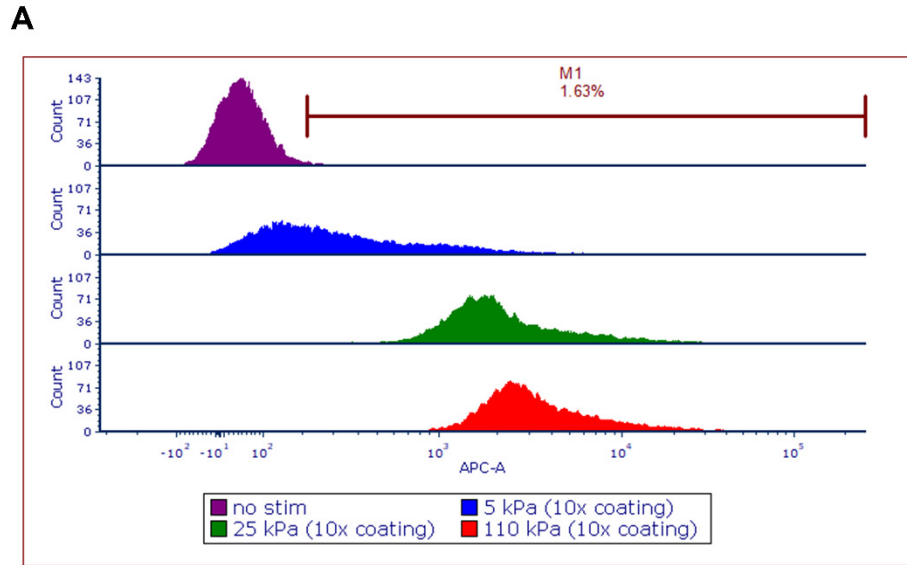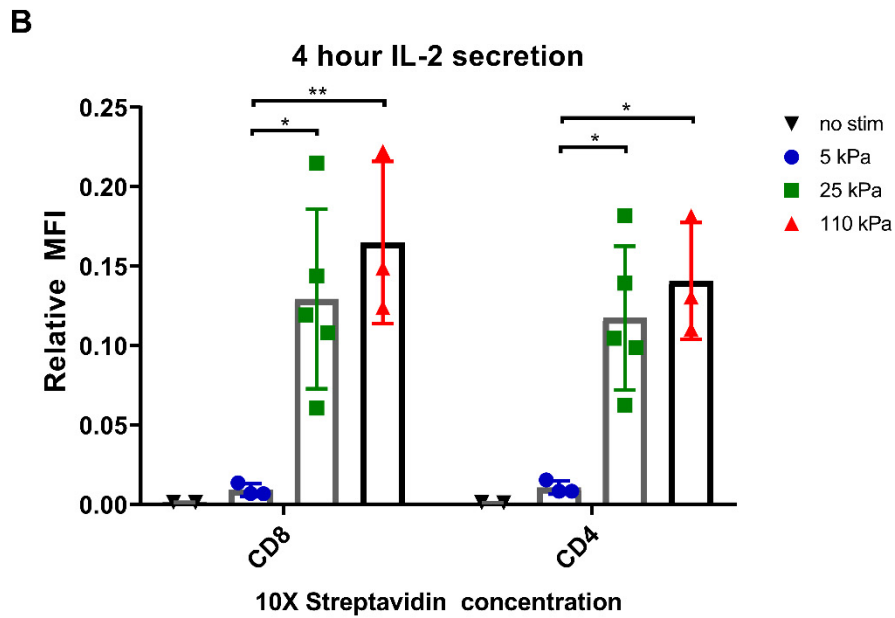

**Figure S2.** Representative intensity plots of IL-2 secretion of T cells activated on hydrogels of various rigidities, with A) 10X coating. B) 4 hour IL-2 secretion of CD4 and CD8 T cells activated on 10X coated substrates. Data are mean  $\pm$  s.d., \* $p < 0.05$ , \*\* $p < 0.01$ , 2-way ANOVA, Tukey multiple comparison test.
